# Supplementary material
Source: Springer Nature journal article supplement (https://www.springermedizin.de/resource/supplementary/12992_2010_95_MOESM1_ESM.pdf/9616448)
Supplement: MOESM1 [file 9616448]

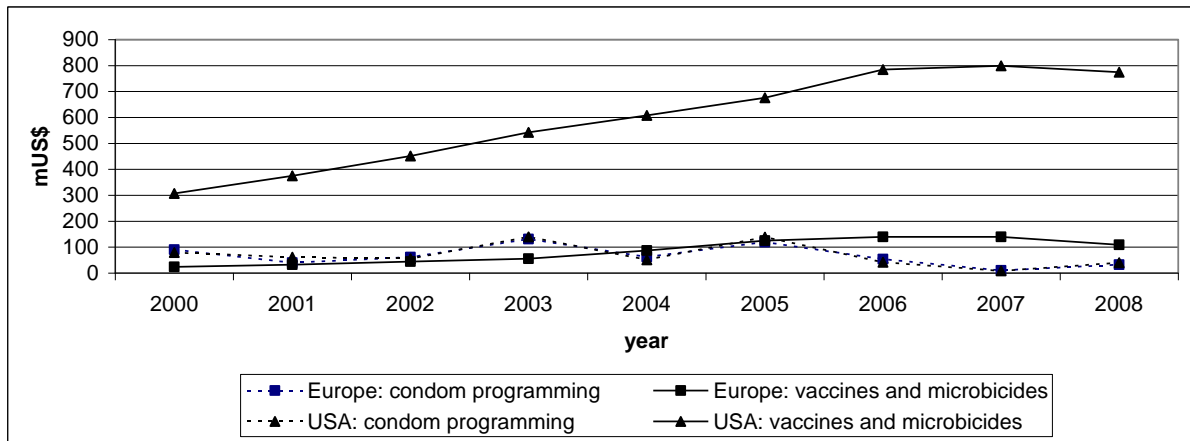

|                                   | 2000 | 2001 | 2002 | 2003 | 2004 | 2005 | 2006 | 2007 | 2008 |
|-----------------------------------|------|------|------|------|------|------|------|------|------|
| Europe: condom programming        | 90   | 40   | 61   | 131  | 62   | 119  | 54   | 11   | 33   |
| Europe: vaccines and microbicides | 24   | 32   | 44   | 55   | 87   | 125  | 139  | 139  | 109  |
| USA: condom programming           | 79   | 61   | 56   | 140  | 51   | 139  | 41   | 9    | 40   |
| USA: vaccines and microbicides    | 307  | 375  | 451  | 542  | 608  | 676  | 784  | 799  | 774  |
